# Supplementary material for: Optimal coordination and reorganization of photosynthetic properties in C4 grasses
Source: bioRxiv or medRxiv preprint supplement (doi:10.1101/2020.05.15.098327), 2021-03-28
Supplement: Supplementary file [file media-1.pdf]

Supplementary Figures and Tables

Article title: Optimal coordination and reorganization of photosynthetic properties in C<sub>4</sub> grasses

Authors: Haoran Zhou, Erol Akçay, Brent Helliker

Fig. S1 Phylogenetic sampling of the species for measuring photosynthetic traits and the independent evolutionary lineages corresponding to grass lineages. Black represents C<sub>3</sub> species and red represents C<sub>4</sub> species.

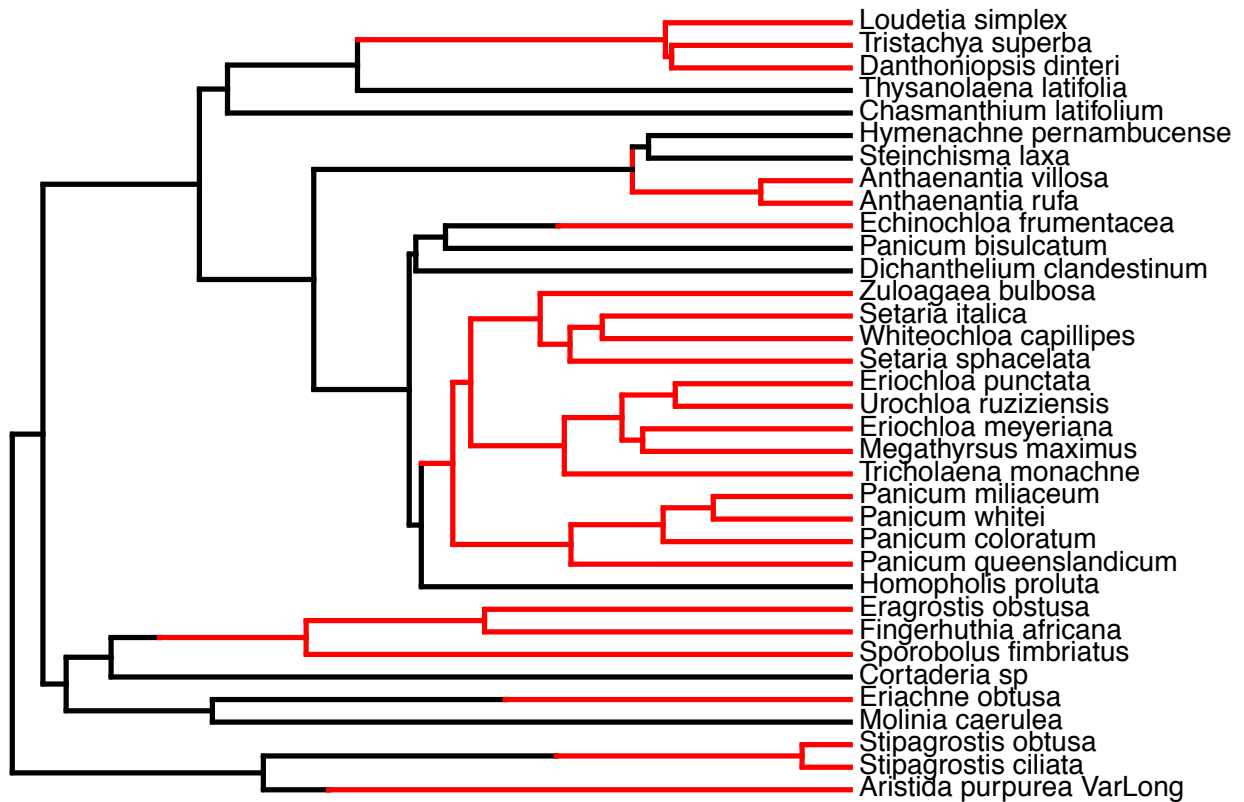

**Fig. S2** Modeling results of assimilation rate with varying  $J_{\max}/V_{\text{cmax}}$  and  $V_{\text{pmax}}/V_{\text{cmax}}$  for  $C_4$  under different  $\text{CO}_2$  concentration and  $\psi_s=-1\text{MPa}$ ,  $\text{VPD}=1.25$ , temperature of  $25\text{ }^\circ\text{C}$  and light intensity of  $2000\text{ }\mu\text{mol m}^{-2}\text{ s}^{-1}$ , the common grassland growth condition. Modeling results were obtained by controlling the other parameter at the in vitro measurement level.

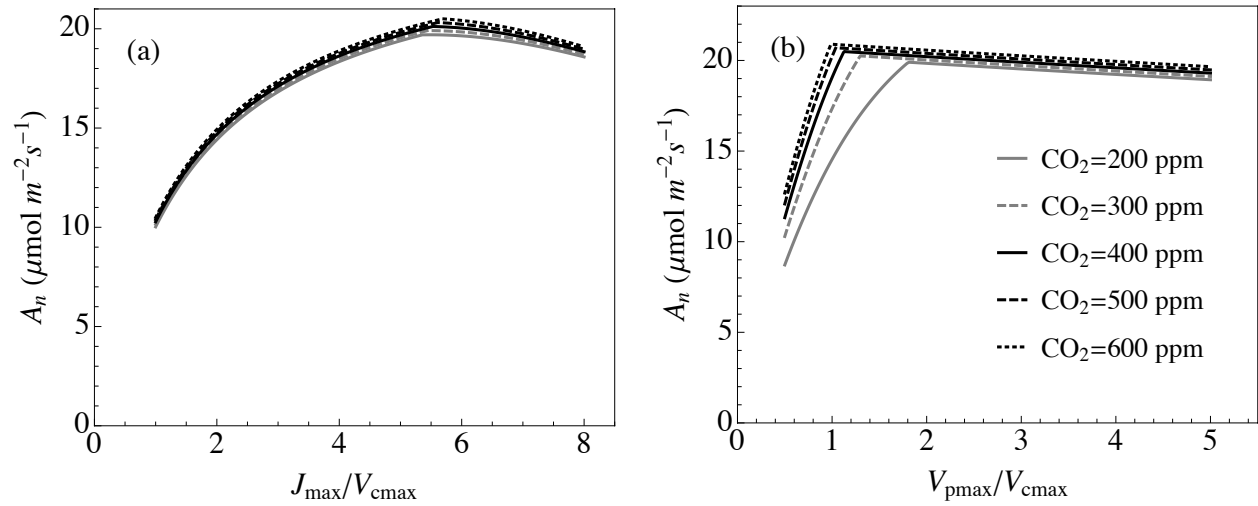

**Fig. S3** Modeling results of optimal  $J_{\max}/V_{\text{cmax}}$  and  $V_{\text{pmax}}/V_{\text{cmax}}$  for  $C_3$  (black lines) and  $C_4$  (red lines) under different environmental conditions. (a) Solid line: different  $\text{CO}_2$ ; dashed line: different water limitation conditions (1: saturated water; 2:  $\psi_s=-0.5$  MPa,  $\text{VPD}=0.625$ ; 3:  $\psi_s=-1$  MPa,  $\text{VPD}=1.25$  MPa; 4:  $\psi_s=-1.5$  MPa,  $\text{VPD}=1.875$ ; 5:  $\psi_s=-2$  MPa,  $\text{VPD}=2.5$ ). (b) Solid line: different light intensities; dashed line: different temperature. Modeling results were obtained by controlling the other parameter at the in vitro measurement level.

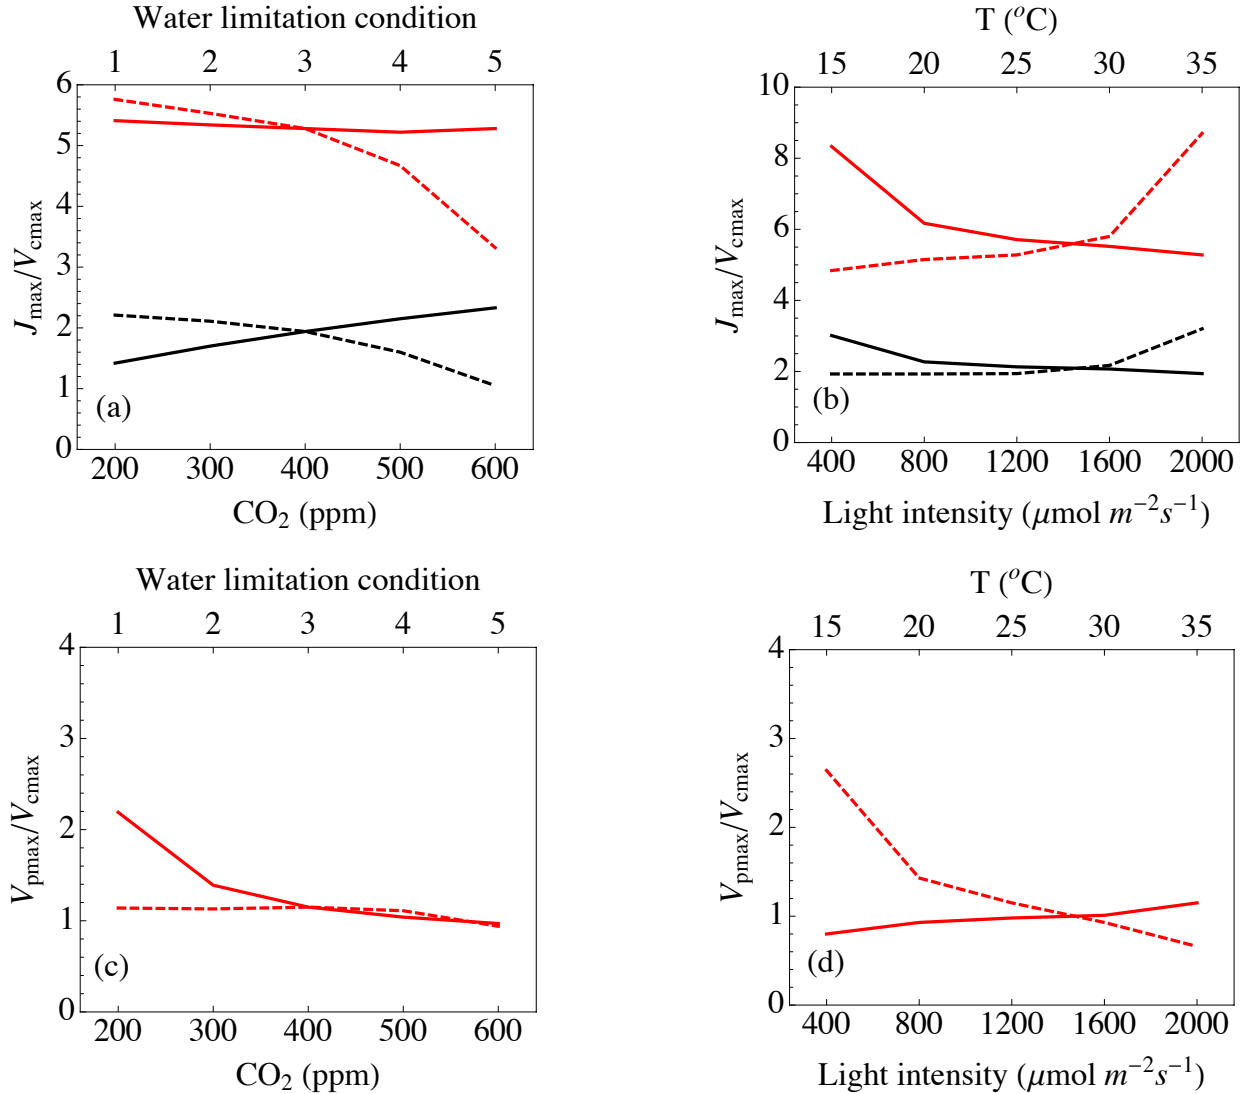

**Fig. S4** Sensitivity analysis of total nitrogen and PEPC stoichiometry on optimal  $J_{\max}/V_{\text{cmax}}$  for  $\text{C}_3$  (black dots) and  $J_{\max}/V_{\text{cmax}}$  (red dots) and  $V_{\text{pmax}}/V_{\text{cmax}}$  (red diamonds) for  $\text{C}_4$ .

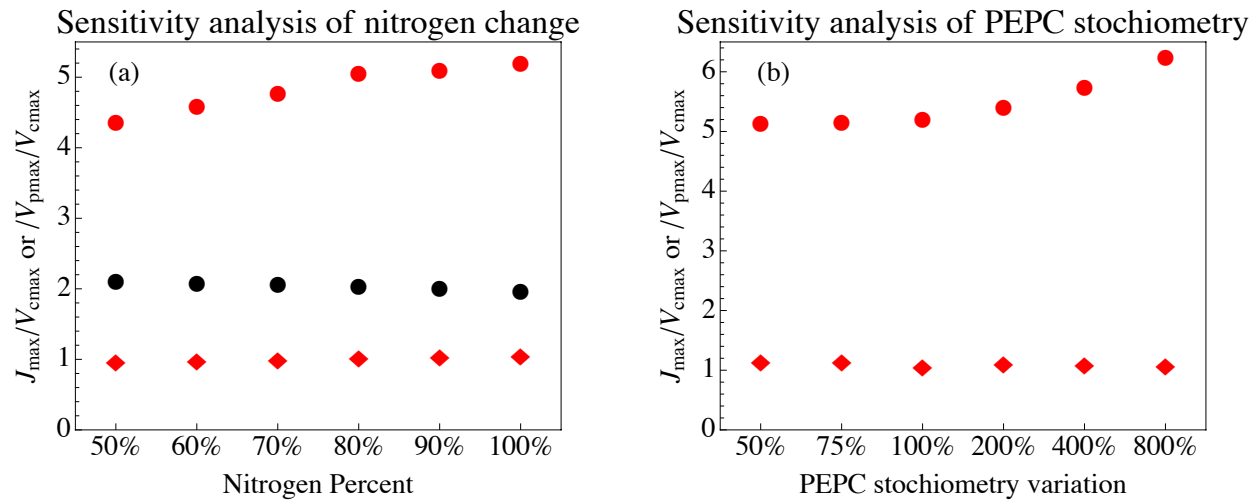

**Table S1** The evolutionary models used for the phylogenetic analysis for photosynthetic properties evolutionary differences between C3 and C4 species.

| Model   | Evolution | Fluctuation rate | Root |
|---------|-----------|------------------|------|
| Model 1 | BM        | One              | One  |
| Model 2 | BM        | Two              | One  |
| Model 3 | BM        | One              | Two  |
| Model 4 | BM        | Two              | Two  |
| Model 5 | OU        | One              | One  |
| Model 6 | OU        | One              | Two  |

**Table S2** Phylogenetic analysis results for Jmax/Vcmax for C3 and C4 species.

| Model          | AICw         | AIC          | AICc         | Variance       |                | Mean           |                |
|----------------|--------------|--------------|--------------|----------------|----------------|----------------|----------------|
|                |              |              |              | C <sub>3</sub> | C <sub>4</sub> | C <sub>3</sub> | C <sub>4</sub> |
| Model 1        | 0.000        | 138.66       | 139.04       | 0.127          |                | 4.349          |                |
| Model 2        | 0.000        | 103.43       | 104.20       | 0.445          | .003           | 5.520          |                |
| Model 3        | 0.000        | 140.01       | 140.78       | 0.124          |                | 4.028          | 4.469          |
| Model 4        | 0.000        | 104.15       | 105.49       | 0.440          | 0.002          | 5.395          | 5.557          |
| Model 5        | 0.000        | 142.80       | 143.57       | 0.188          |                | 4.375          |                |
| <b>Model 6</b> | <b>1.000</b> | <b>16.41</b> | <b>17.75</b> | <b>0.0276</b>  |                | <b>1.593</b>   | <b>5.899</b>   |

**Table S3** Phylogenetic analysis results for Vcmax for C3 and C4 species.

| Model          | AICw         | AIC           | AICc          | Variance       |                | Mean           |                |
|----------------|--------------|---------------|---------------|----------------|----------------|----------------|----------------|
|                |              |               |               | C <sub>3</sub> | C <sub>4</sub> | C <sub>3</sub> | C <sub>4</sub> |
| Model 1        | 0.000        | 306.21        | 306.58        | 14.801         |                | 32.133         |                |
| Model 2        | 0.167        | 273.40        | 274.17        | 49.056         | 0.916          | 24.216         |                |
| Model 3        | 0.000        | 308.60        | 308.37        | 14.536         |                | 35.451         | 30.893         |
| Model 4        | 0.064        | 275.31        | 276.65        | 49.188         | 0.908          | 23.826         | 24.345         |
| Model 5        | 0.000        | 310.22        | 311.00        | 32.372         |                | 32.725         |                |
| <b>Model 6</b> | <b>0.769</b> | <b>270.34</b> | <b>271.67</b> | <b>127.883</b> |                | <b>59.524</b>  | <b>20.782</b>  |

**Table S4** Phylogenetic analysis results for Jmax for C3 and C4 species.

| Model   | AICw  | AIC    | AICc   | Variance       |                | Mean           |                |
|---------|-------|--------|--------|----------------|----------------|----------------|----------------|
|         |       |        |        | C <sub>3</sub> | C <sub>4</sub> | C <sub>3</sub> | C <sub>4</sub> |
| Model 1 | 0.201 | 338.96 | 339.33 | 33.249         |                | 110.379        |                |

|                |              |               |               |               |        |               |                |
|----------------|--------------|---------------|---------------|---------------|--------|---------------|----------------|
| Model 2        | 0.074        | 340.95        | 341.73        | 33.985        | 32.687 | 110.690       |                |
| Model 3        | 0.079        | 340.82        | 341.59        | 33.145        |        | 107.932       | 111.346        |
| Model 4        | 0.029        | 342.81        | 344.15        | 34.153        | 32.377 | 108.327       | 111.775        |
| Model 5        | 0.032        | 342.61        | 343.38        | 66.102        |        | 111.266       |                |
| <b>Model 6</b> | <b>0.583</b> | <b>336.83</b> | <b>338.16</b> | <b>83.786</b> |        | <b>88.935</b> | <b>132.164</b> |

**Table S5** Phylogenetic analysis results for total chlorophyll for C3 and C4 species.

| Model          | AICw         | AIC          | AICc         | Variance       |                | Mean           |                |
|----------------|--------------|--------------|--------------|----------------|----------------|----------------|----------------|
|                |              |              |              | C <sub>3</sub> | C <sub>4</sub> | C <sub>3</sub> | C <sub>4</sub> |
| <b>Model 1</b> | <b>0.293</b> | <b>-58.9</b> | <b>-58.6</b> | <b>0.0003</b>  |                | <b>0.364</b>   |                |
| Model 2        | 0.251        | -58.6        | -57.8        | 0.0006         | 0.0003         | 0.366          |                |
| Model 3        | 0.285        | -58.9        | -58.1        | 0.0003         |                | 0.395          | 0.352          |
| Model 4        | 0.152        | -57.6        | -56.3        | 0.0005         | 0.0003         | 0.389          | 0.357          |
| Model 5        | 0.011        | -52.3        | -51.5        | 0.0012         |                | 0.365          |                |
| Model 6        | 0.009        | -51.9        | -50.5        | 0.0013         |                | 0.399          | 0.330          |

**Table S6** Phylogenetic analysis results for ETR/J for C3 and C4 species.

| Model          | AICw         | AIC           | AICc          | Variance       |                | Mean           |                |
|----------------|--------------|---------------|---------------|----------------|----------------|----------------|----------------|
|                |              |               |               | C <sub>3</sub> | C <sub>4</sub> | C <sub>3</sub> | C <sub>4</sub> |
| Model 1        | 0.000        | -16.61        | -16.23        | 0.001          |                | 0.825          |                |
| Model 2        | 0.000        | -43.71        | -42.94        | 0.005          | 8e-05          | 0.717          |                |
| Model 3        | 0.000        | -14.94        | -14.17        | 0.001          |                | 0.850          | 0.815          |
| Model 4        | 0.000        | -41.72        | -40.38        | 0.005          | 8e-05          | 0.716          | 0.717          |
| Model 5        | 0.000        | -12.60        | -11.82        | 0.003          |                | 0.817          |                |
| <b>Model 6</b> | <b>1.000</b> | <b>-84.01</b> | <b>-82.68</b> | <b>0.004</b>   |                | <b>1.082</b>   | <b>0.643</b>   |

**Table S7** Phylogenetic analysis results for chlorophyll a/chlorophyll b for C3 and C4 species.

| Model          | AICw         | AIC         | AICc        | Variance       |                | Mean           |                |
|----------------|--------------|-------------|-------------|----------------|----------------|----------------|----------------|
|                |              |             |             | C <sub>3</sub> | C <sub>4</sub> | C <sub>3</sub> | C <sub>4</sub> |
| Model 1        | 0.000        | 44.3        | 44.7        | 0.008          |                | 4.004          |                |
| Model 2        | 0.002        | 40.8        | 41.6        | 0.018          | 0.003          | 4.178          |                |
| Model 3        | 0.000        | 43.6        | 44.4        | 0.008          |                | 3.842          | 4.066          |
| Model 4        | 0.003        | 40.1        | 41.5        | 0.018          | 0.003          | 4.054          | 4.224          |
| Model 5        | 0.000        | 49.5        | 50.3        | 0.012          |                | 3.972          |                |
| <b>Model 6</b> | <b>0.995</b> | <b>28.3</b> | <b>29.7</b> | <b>0.008</b>   |                | <b>3.401</b>   | <b>4.611</b>   |

**Table S8** Phylogenetic analysis results for ETR for C3 and C4 species.

| Model          | AICw         | AIC          | AICc         | Variance       |                | Mean           |                |
|----------------|--------------|--------------|--------------|----------------|----------------|----------------|----------------|
|                |              |              |              | C <sub>3</sub> | C <sub>4</sub> | C <sub>3</sub> | C <sub>4</sub> |
| <b>Model 1</b> | <b>0.397</b> | <b>333.6</b> | <b>334.0</b> | <b>30.844</b>  |                | <b>88.941</b>  |                |
| Model 2        | 0.165        | 335.4        | 336.1        | 37.380         | 27.334         | 89.019         |                |
| Model 3        | 0.148        | 335.6        | 336.4        | 30.798         |                | 87.900         | 89.327         |
| Model 4        | 0.063        | 337.3        | 338.6        | 38.118         | 26.881         | 87.284         | 89.643         |
| Model 5        | 0.137        | 335.7        | 336.5        | 85.615         |                | 87.068         |                |
| Model 6        | 0.091        | 336.5        | 337.9        | 75.383         |                | 95.639         | 78.986         |

**Table S9** Phylogenetic analysis results of evolutionary model fitting for Vpmax for C4 species.

| Model          | AICw  | AIC    | AICc   | Variance       |                | Mean           |                |
|----------------|-------|--------|--------|----------------|----------------|----------------|----------------|
|                |       |        |        | C <sub>3</sub> | C <sub>4</sub> | C <sub>3</sub> | C <sub>4</sub> |
| Model 1        | 0.146 | 213.05 | 213.57 | 7.585          |                | 41.583         |                |
| <b>Model 4</b> | 0.854 | 209.53 | 210.62 | 43.126         |                | 41.520         |                |

**Table S10** Phylogenetic analysis results of evolutionary model fitting for Vpmax/Vcmax for C4, C3.

| Model          | AICw  | AIC   | AICc  | Variance       |                | Mean           |                |
|----------------|-------|-------|-------|----------------|----------------|----------------|----------------|
|                |       |       |       | C <sub>3</sub> | C <sub>4</sub> | C <sub>3</sub> | C <sub>4</sub> |
| Model 1        | 0.125 | 6.813 | 7.333 | 0.003          |                | 1.908          |                |
| <b>Model 4</b> | 0.875 | 2.913 | 4.004 | 0.015          |                | 1.966          |                |

**Table S11** Phylogenetic analysis results for Nitrogen for C3 and C4 species.

| Model          | AICw  | AIC   | AICc  | Variance       |                | Mean           |                |
|----------------|-------|-------|-------|----------------|----------------|----------------|----------------|
|                |       |       |       | C <sub>3</sub> | C <sub>4</sub> | C <sub>3</sub> | C <sub>4</sub> |
| <b>Model 1</b> | 0.184 | 74.82 | 75.20 | 0.013          |                | 3.029          |                |
| Model 2        | 0.075 | 76.61 | 77.41 | 0.016          | 0.016          | 2.981          |                |
| Model 3        | 0.088 | 76.29 | 77.09 | 0.013          |                | 2.907          | 3.082          |
| Model 4        | 0.053 | 77.33 | 78.71 | 0.021          | 0.008          | 2.712          | 3.011          |
| Model 5        | 0.037 | 78.01 | 78.81 | 0.029          |                | 3.120          |                |
| Model 6        | 0.562 | 72.59 | 73.97 | 0.021          |                | 3.624          | 2.530          |
